# Supplementary material for: A recurrent mitochondrial p.Trp22Arg NDUFB3 variant causes a distinctive facial appearance, short stature and a mild biochemical and clinical phenotype
Source: PubMed Central journal article supplement (PMC5013090; doi:10.1136/jmedgenet-2015-103576), 2016-04-18
Supplement: jmedgenet-2015-103576supp_table.pdf [file jmedgenet-2015-103576supp_table.pdf]

**Supplementary Table 1.** Genes included on a custom Ampliseq “Isolated complex I deficiency” target capture and their corresponding GenBank reference sequences.

|    | <b>Gene</b>     | <b>Reference sequence</b> |
|----|-----------------|---------------------------|
| 1  | <i>NDUFA1</i>   | NM_004541.3               |
| 2  | <i>NDUFA2</i>   | NM_002488.4               |
| 3  | <i>NDUFA3</i>   | NM_004542.3               |
| 4  | <i>NDUFA5</i>   | NM_005000.4               |
| 5  | <i>NDUFA6</i>   | NM_002490.3               |
| 6  | <i>NDUFA7</i>   | NM_005001.3               |
| 7  | <i>NDUFA8</i>   | NM_014222.2               |
| 8  | <i>NDUFA9</i>   | NM_005002.4               |
| 9  | <i>NDUFA10</i>  | NM_004544.3               |
| 10 | <i>NDUFA11</i>  | NM_175614.4               |
| 11 | <i>NDUFA12</i>  | NM_018838.4               |
| 12 | <i>NDUFA13</i>  | NM_015965.6               |
| 13 | <i>NDUFAB1</i>  | NM_005003.2               |
| 14 | <i>NDUFB1</i>   | NM_004545.3               |
| 15 | <i>NDUFB2</i>   | NM_004546.2               |
| 16 | <i>NDUFB3</i>   | NM_002491.2               |
| 17 | <i>NDUFB4</i>   | NM_004547.5               |
| 18 | <i>NDUFB5</i>   | NM_002492.4               |
| 19 | <i>NDUFB6</i>   | NM_002493.4               |
| 20 | <i>NDUFB7</i>   | NM_004146.5               |
| 21 | <i>NDUFB8</i>   | NM_005004.2               |
| 22 | <i>NDUFB9</i>   | NM_005005.2               |
| 23 | <i>NDUFB10</i>  | NM_004548.2               |
| 24 | <i>NDUFB11</i>  | NM_019056.5               |
| 25 | <i>NDUFC1</i>   | NM_002494.3               |
| 26 | <i>NDUFC2</i>   | NM_004549.5               |
| 27 | <i>NDUFS1</i>   | NM_005006.6               |
| 28 | <i>NDUFS2</i>   | NM_004550.4               |
| 29 | <i>NDUFS3</i>   | NM_004551.2               |
| 30 | <i>NDUFS4</i>   | NM_002495.2               |
| 31 | <i>NDUFS5</i>   | NM_004552.2               |
| 32 | <i>NDUFS6</i>   | NM_004553.4               |
| 33 | <i>NDUFS7</i>   | NM_024407.4               |
| 34 | <i>NDUFS8</i>   | NM_002496.3               |
| 35 | <i>NDUFV1</i>   | NM_007103.3               |
| 36 | <i>NDUFV2</i>   | NM_021074.4               |
| 37 | <i>NDUFV3</i>   | NM_001001503.1            |
| 38 | <i>NDUFAF1</i>  | NM_016013.3               |
| 39 | <i>NDUFAF2</i>  | NM_174889.4               |
| 40 | <i>NDUFAF3</i>  | NM_199069.1               |
| 41 | <i>NDUFAF4</i>  | NM_014165.3               |
| 42 | <i>NDUFAF5</i>  | NM_024120.4               |
| 43 | <i>NDUFAF6</i>  | NM_152416.3               |
| 44 | <i>NDUFAF7</i>  | NM_144736.4               |
| 45 | <i>ACAD9</i>    | NM_014049.4               |
| 46 | <i>NUBPL</i>    | NM_025152.2               |
| 47 | <i>FOXRED1</i>  | NM_017547.3               |
| 48 | <i>ECSIT</i>    | NM_016581.4               |
| 49 | <i>TMEM126B</i> | NM_018480.3               |
